16 **Summary**

17 A cognitive map, representing an environment around oneself, is necessary for spatial  
18 navigation. However, compared with its constituent elements such as individual landmarks,  
19 neural substrates of the coherent spatial information remain largely unknown. The present study  
20 investigated how the brain codes map-like representations in a virtual environment specified by  
21 relative positions of three objects. Representational similarity analysis revealed the object-based  
22 spatial environment in the hippocampus (HPC) when participants located their self-positions  
23 within it, while the medial prefrontal cortex (mPFC) represented it when they recollected a target  
24 object's location relative to their self-body. During the recollection, task-dependent functional  
25 connectivity increased between the two areas implying exchange of self- and target-location  
26 signals between HPC and mPFC. Together, the coherent cognitive map may be recruited in HPC  
27 and mPFC for complementary functions when we relate ourselves with a target object including  
28 person for navigation, and presumably for social interactions.

29

30 **Key words:** cognitive map, spatial navigation, episodic memory, memory-guided decision  
31 making, social interaction, hippocampus, medial prefrontal cortex, default mode network,  
32 representational similarity analysis.

33

34

35

## 36 **Introduction**

37 During navigation, it is necessary to locate our self-position in the current spatial  
38 environment as well as to locate the objects relative to the self-body (i.e., egocentric  
39 location). To conduct each of the two mental operations, we need map-like representations,  
40 called “cognitive map” in our brain (Tolman, 1948). After the discovery of “place cells,” the  
41 hippocampus (HPC) of the medial temporal lobe (MTL) has been considered responsible for  
42 the cognitive map (Buffalo, 2015), and crucial contributions of the HPC to spatial memory  
43 have also been reported by animal model studies that evaluated behavioral patterns of rodents  
44 with an inactivated HPC using the Morris water maze and cross-maze (Nakazawa et al.,  
45 2002; Packard and McGaugh, 1996; Redish and Touretzky, 1998) as well as human studies  
46 that demonstrated the relationship between HPC volume in individual subjects and their  
47 amounts of experience exploring spatial environments (Woollett and Maguire, 2011; Schinazi  
48 et al., 2013, e.g., London taxi drivers). However, it remains largely unknown how neural  
49 substrates of the cognitive map are involved in the two mental operations required for the  
50 recollection of an egocentric location of a target object. One possible reason for the difficulty  
51 in addressing this question is that despite extensive studies on the spatial elements related to  
52 the cognitive map (e.g., self-location, head-direction etc.) (O'Keefe and Dostrovsky, 1971;  
53 Vass and Epstein, 2013; Chadwick et al., 2015; Buffalo, 2015; McCormick et al., 2018;),  
54 there is still a lack of sufficient isolation and characterization of the neural signal of the  
55 cognitive map under the previous research paradigms.

56 In addition to the HPC, the role of the medial prefrontal cortex (mPFC) in goal-  
57 directed planning during navigation was demonstrated by a previous human fMRI study that  
58 showed increased connectivity between the HPC and mPFC (Brown et al., 2016). The mPFC  
59 has been long considered as a member of the core-brain system in the retrieval of episodic  
60 memory (Konishi et al., 2000; Eichenbaum, 2017; McCormick et al., 2018), which is an

61 autobiographical memory consisting of spatial, object, and temporal information (Suzuki and  
62 Naya, 2011; Naya and Suzuki, 2011; Squire and Wixted, 2011). Schacter et al. (2007)  
63 suggested an involvement of the mPFC in future-simulation processing and recollection of  
64 past episodes, which depend on mnemonic information stored as declarative memory  
65 including both episodic and semantic memory. Recently, they also showed increased  
66 connectivity between the HPC and mPFC during future simulation (Campbell et al., 2018).  
67 This preceding literature suggests that the HPC and mPFC, which belong to the default-mode  
68 network, work together when remembering stored information (e.g., cognitive map) and  
69 construct the mental representation of goal-directed information (e.g., target-location) from  
70 mnemonic information with the current context (e.g., self-location) (Schacter, 2012).  
71 However, the specific functional role of each of HPC and mPFC during the construction  
72 process (McCormick et al., 2018; Campbell et al., 2018) remain elusive, presumably because  
73 the construction of goal-directed information (e.g., spatial navigation) includes at least two  
74 mental operations described above (i.e., locating self and locating the target relative to self-  
75 location), and the previous experimental paradigms mostly unseparated them.

76         To address these issues, we aimed to devise a novel 3D spatial-memory task with  
77 spatial environments defined by objects, which would enable us to identify the representation  
78 of the cognitive map and to investigate how it is related to the two mental operations (Fig. 1).  
79 We used the same stimulus set consisting of three different human characters through the  
80 entire experiment, while the spatial configuration of the three characters was changed trial-  
81 by-trial. The spatial configuration pattern was referred to as a “*map*” in the present study  
82 (Fig. 1b). In each trial, participants encoded a *map* from the first-person’s view by walking  
83 toward the characters in one of four fixed walking directions (walking period, Fig. 1c, see  
84 Methods). Following the walking period, one human character (facing object) was presented  
85 on a virtual-environment background with other characters being invisible, which gave the

86 participants a feeling of facing the presented character in the virtual environment (i.e., facing  
87 period). After a short delay, one of the two remaining characters (targeting object) was  
88 presented without the virtual environment background, and the participants were required to  
89 remember the location of this second human character relative to their self-body (i.e.,  
90 targeting period). Thus, the two mental operations were separated into two periods within a  
91 single trial. This task design allowed us to detect the brain regions that distinguished the  
92 spatial configurations of the objects (i.e., *map*) around the participants during the facing  
93 period and targeting period separately. The results of the representational similarity analysis  
94 (RSA; see Methods for details) (Kriegeskorte et al., 2012; Kriegeskorte et al., 2008) showed  
95 that the spatial environment defined by the three objects were represented in the HPC during  
96 the facing period, while it was represented in the vmPFC during the targeting period,  
97 suggesting different contributions of the object-based cognitive map to the recollection  
98 between the two brain areas of the default mode network.

## 99 **Results**

100 The experiment was conducted in two days with 19 participants. On the first day, the  
101 participants were familiarized with the 3D virtual environment and the three human  
102 characters through a head-nodding detection (HND) task (Fig. S1a). In this task, the  
103 participants had the same walking experience as in the spatial-memory task but were  
104 subsequently asked to indicate whether a character in a photo nodded its head during the  
105 walking period. On the second day, the participants performed the spatial-memory task under  
106 scanning. To prevent voluntary memorization of the spatial relationship of the human  
107 characters during the walking period, the HND trials were pseudo-randomly mixed with the  
108 spatial-memory trials at the ratio of 1:10, and the participants were instructed to focus on  
109 head-nodding of the human characters during the walking period in all trials. All participants  
110 exhibited a top-ceiling performance with a  $93.6\% \pm 0.02\%$  correct rate (mean  $\pm$  SE,  $n = 19$ )  
111 for the spatial-memory task and no significant difference was found among each of the task  
112 parameters (e.g., maps, walking directions) (Fig. S1c). All participants showed an accuracy  
113 that was significantly higher than chance level (50%) in both the head-nodding and no head-  
114 nodding trials (Fig. S1a). Attempts to memorize the spatial arrangements of the human  
115 characters during scanning were examined using post-scanning questionnaires. All  
116 participants reported that they did not make any voluntary effort to memorize the spatial  
117 relationship of the three human characters nor utilize any special strategy for memorizing it  
118 (Table S2). It should be noted that no participant was able to recall the number of map  
119 patterns they experienced in the experiment even though only three of the six possible  
120 patterns of maps were repeatedly presented to each participant. In addition, no significant  
121 changes in performance was found across four experimental sessions (Fig. S1b;  $F(3,72) =$   
122  $0.38$ ,  $P < 0.001$ ), suggesting that the participants performed the spatial-memory task with  
123 high-performance from the beginning and did not learn to use a systematic strategy to

124 improve their performance during the sessions. These behavioral results guarantee that the  
125 participants automatically encoded maps during the walking period when viewing the human  
126 characters attentively to detect head-nodding.

127

### 128 **Neural representation of the cognitive map during locating self-position**

129 We first assessed the map representation during the facing period (4.0 s including the  
130 subsequent delay; Fig. 2a), in which the participants oriented themselves to a presented  
131 human character in the 3D environment. To decode the map information across the whole  
132 brain, we conducted searchlight-based RSA, which compared the multi-voxel pattern  
133 similarities of the “same map” and “different map” between trial pairs across each brain  
134 voxel by drawing a 6 mm radius sphere with each voxel in the spherical center. Map  
135 information was decoded regardless of other task parameters such as the walking direction or  
136 the identity of the facing character (see Methods for details and Table S1 for the regressor list  
137 and the averaged  $r^2$  among the regressors in each GLM). We found a cluster located in the  
138 left middle HPC (mHPC; Fig. 2b,  $P < 0.01$ , voxel-wise threshold;  $P < 0.05$ , cluster-  
139 corrected), suggesting that the map defined by multiple objects is represented in the HPC. In  
140 addition to the mHPC, the searchlight-based RSA revealed clusters in the insula, angular  
141 gyrus, and superior temporal cortex (Fig. S2b,  $P < 0.01$ , voxel-wise threshold;  $P < 0.05$ ,  
142 cluster-corrected; see discussion). To validate the searchlight-based RSA result showing that  
143 the left mHPC represents map information, we manually segmented the sub-regions in the  
144 MTL in each participant’s native space (Fig. S4, left panel) and conducted an independent  
145 RSA within each anatomical mask (see Methods for details). The region of interest (ROI)-  
146 based result also showed that only the left mHPC had a significantly higher pattern similarity  
147 to “same maps” relative to “different maps” among the MTL sub-regions (Fig. S5a;  $t(18) =$   
148  $2.94$ ,  $P = 0.004$ , Bonferroni corrected for multiple comparisons,  $\alpha < 0.05$ ).

149 To examine possible signal input from the MTL sub-regions to the left mHPC for the  
150 map construction, we examined the neural representation of the facing-character identity and  
151 walking direction that the participants perceptually and/or mentally re-experienced during the  
152 facing period based on the post-scanning test (Table S2; Fig. S3a). Searchlight-based RSA  
153 revealed that the bilateral perirhinal cortex (PRC) encoded character identity (Fig. S3b;  $P <$   
154  $0.001$ , initial threshold;  $P < 0.05$ , cluster-corrected) (Naya et al., 2001; Suzuki and Naya,  
155 2014), while the parahippocampal cortex (PHC) and left retrosplenial cortex (RSC) encoded  
156 the walking directions reflecting the spatial layout of one empty and three occupied positions  
157 perceived by the participants during the walking period (Fig. 1c). In the HPC, the left  
158 posterior HPC (pHPC) selectively represented the spatial layout but not the character identity,  
159 while the bilateral anterior HPC (aHPC) revealed clusters for both character identity and  
160 spatial layout (Fig. S3b). These results were consistent with the notion of the “two cortical  
161 systems” model that suggests that object identity and spatiotemporal context are processed in  
162 two separate neural systems with the PRC and PHC-RSC as the core brain regions, with the  
163 two different information domains interacting in the HPC (Ranganath and Ritchey., 2012).  
164 Together, the RSA analyses demonstrated that the MTL is crucial for representing the spatial  
165 environment in the following ways: elements such as each object identity and spatial layout  
166 were represented by extrahippocampal areas while the relative relationship between multi-  
167 objects was represented in the HPC, suggesting cognitive map representation in the HPC.

168

### 169 **Cognitive map during localizing target**

170 In contrast to locate self-position, a clear difference was found in brain regions responsible  
171 for the map representations when the participants remembered the location of a target  
172 character relative to their self-body (egocentric target location). In contrast to the facing  
173 period, clusters representing the map information were revealed mainly in the Rectus and



174 Brodmann area 10 of the vmPFC (Peak coordinates: 4, 50, -18; t value: 5.62), rather than in  
175 the HPC, during the targeting period. We confirmed that no cluster was found in the MTL  
176 even though a more liberal threshold was used ( $P < 0.01$ , voxel-wise threshold, uncorrected).  
177 To validate this result, we conducted an independent RSA using frontal sub-regions of the  
178 automated anatomical labeling (AAL, Fig. S4, right panel) template as well as manually  
179 segmented MTL sub-regions as ROIs. The result confirmed that the map information was  
180 represented in the rectus of the prefrontal region (Fig. S5a,  $t(18) = 4.64$ ,  $P = 0.0001$ ,  
181 Bonferroni corrected for multiple comparisons,  $\alpha < 0.05$ ), while no MTL sub-regions  
182 revealed map representation significantly during the targeting period. Together with the  
183 facing period results, these results revealed a double dissociation of MTL and mPFC function  
184 in the map representation between the task demands, implying that the mPFC, rather than the  
185 MTL, carried the map information during the generation of the egocentric location signal of a  
186 target character but during self-body locating. Our results indicate that the HPC and mPFC  
187 operate in a complementary manner, supporting the notion of the “parallel, but interactive  
188 cognitive map” between the two brain structures (Wikenheiser and Schoenbaum., 2016).  
189 Outside of the vmPFC, we found clusters in the precuneus and middle temporal gyrus, and  
190 the inferior frontal cortex (Fig. 2c, Fig. S2c;  $P < 0.001$ , voxel-wise threshold;  $P < 0.05$ ,  
191 cluster-corrected). These three brain regions have been consistently reported to be involved in  
192 scene construction during recalling of past experience and imagination of new experiences  
193 (Hassabis and Maguire, 2007; Bird et al., 2010; Gaesser et al., 2013), which is consistent with  
194 the post-scanning report showing that all participants recalled and also imagined the  
195 egocentric positions of the three human characters during the targeting period.

196 As with the facing period, we examined neural representation of targeting character  
197 identity and walking direction during the targeting period and found that the PRC stably  
198 represented character identity (Fig. S3b;  $P < 0.001$ , initial threshold;  $P < 0.05$ , cluster-

199 corrected), while we did not find clusters for the spatial layout depending on the walking  
200 direction. These results suggested that the HPC did not construct the map information from  
201 its constituent elements during the targeting period.

202

### 203 **Current self-orientation on the map**

204 To compute the egocentric location of a target object (e.g., left, right, or back), information  
205 on the current self-position/orientation on the map is necessary (Fig. 3a). Therefore, we  
206 examined which brain regions were involved in representing such allocentric “heading-  
207 direction” signals (Hargreaves et al., 2005; Wang et al., 2018). Interestingly, while no  
208 significant cluster was revealed during the facing period (facing character; Fig. 3b and  
209 Supplementary Fig. S5b), robust clusters were revealed during the targeting period (Fig. 3b,  $P$   
210  $< 0.001$ , voxel-wise threshold;  $P < 0.05$ , cluster-corrected). These clusters were located in the  
211 ERC, bilateral HPC, and PHC inside the MTL as well as in the lateral occipital cortex,  
212 parietal cortex, precuneus, and anterior cingulate cortex outside the MTL (Fig. 3b,  $P < 0.001$ ,  
213 voxel-wise threshold;  $P < 0.05$ , cluster-corrected). These results suggested that a self-  
214 orientation signal was induced during the targeting period, presumably because of the  
215 necessity to compute the egocentric target location. This interpretation is consistent with the  
216 post-scanning report in which participants reported imagining their self-orientation on the  
217 map only during the targeting period.

218 To further evaluate the role of the MTL in informational representation, we conducted  
219 a ROI-based RSA that computed the averaged pattern similarity among MTL sub-regions for  
220 four spatial parameters (cognitive map, walking direction, character identity, and self-  
221 orientation). The result revealed that the map and walking direction were represented in the  
222 MTL during the facing period (Fig. 3c, cognitive map:  $t(18) = 2.519$ ,  $P = 0.01$ ; walking  
223 direction:  $t(18) = 5.134$ ,  $P = 3.48 \times 10^{-5}$ ) followed by an attenuated-representation during the

224 targeting period (cognitive map:  $t(18) = 1.312$ ,  $P = 0.1$ ; walking direction:  $t(18) = 2.302$ ,  $P =$   
225  $0.02$ ); in contrast, self-orientation was represented in the targeting period only (facing period:  
226  $t(18) = -2.256$ ,  $P = 0.98$ ; targeting period:  $t(18) = 7.11$ ,  $P = 6.28 \times 10^{-7}$ ); Notably, the MTL  
227 showed significant representation for character identity in each period (facing period:  $t(18) =$   
228  $7.732$ ,  $P = 1.98 \times 10^{-7}$ ; targeting period:  $t(18) = 6.687$ ,  $P = 1.42 \times 10^{-6}$ ). These results  
229 demonstrated that MTL encoded or reinstated the information of an external world around the  
230 participants which were necessary for determining an egocentric target location.

231

### 232 **Remembering the egocentric location of a target object**

233 Next, we examined which brain regions signaled the egocentric location (left, right, or back  
234 relative to self-body) of a target object (Fig. 4a). The results revealed robust clusters in both  
235 the mPFC and MTL (Fig. 4a,  $P < 0.001$ , voxel-wise threshold;  $P < 0.05$ , cluster-corrected). In  
236 the mPFC, we identified the rectus, medial/superior orbitofrontal cortex, and olfactory cortex.  
237 In the MTL, clusters were found in the anterior HPC. Apart from the mPFC and MTL,  
238 clusters were also found in the lateral occipital cortex, inferior parietal cortex, anterior  
239 temporal lobe, premotor cortex, and IPFC (middle and superior PFC). We also found clusters  
240 in the precuneus and posterior parietal cortex, which were previously reported to represent  
241 the egocentric location (Chadwick et al., 2015). The widely distributed clusters may indicate  
242 that the brain regions representing the egocentric target locations can be involved in either  
243 generation of the egocentric-target-location information from multiple pieces of information  
244 (cognitive map, self-orientation, and target character identity) or its maintenance while  
245 preparing for the following response. These distinct functions might be supported by three  
246 different large-scale brain networks: the dorsal attention network, frontoparietal control  
247 network, and default mode network (Spreng and Schacter., 2011). In contrast to the robust  
248 signal observed across different brain networks for egocentric target-location, no cluster was

249 revealed for allocentric target location relative to the spatial layout of the characters (Fig. 4b,  
250  $P < 0.001$ , voxel-wise threshold;  $P < 0.05$ , cluster-corrected), which implies that the target  
251 location may be directly retrieved in the form of egocentric coordinates rather than via its  
252 allocentric representation.

253

254 **Increased default-mode network connectivity while locating a target compared with**  
255 **self-locating**

256 The present results showed that the MTL and mPFC signaled a coherent map coding a spatial  
257 relationship of the three human characters during the different time periods in which different  
258 task demands were required (i.e., self-locating and target-locating). In addition, the MTL and  
259 mPFC signaled the different location information even during the same targeting period;  
260 MTL areas tended to represent allocentric self-location while the mPFC tended to represent  
261 egocentric target location. To investigate how the different functional contributions of the  
262 MTL and mPFC were substantiated by whole brain large-scale networks, we conducted a  
263 task-based functional connectivity analysis using MTL and mPFC sub-regions as seeds (six  
264 and five, respectively). For each seed, the mean regional time course was extracted and  
265 correlated with each voxel's time course outside the seed, generating seed-based connectivity  
266 maps for each facing and targeting period. Then, we compared the connectivity between the  
267 two periods using a permutation test (see Methods for details).

268 First, the task-based functional connectivity analysis indicated significantly larger  
269 connectivity between the MTL and mPFC in the targeting period relative to the facing period  
270 ( $t(18) = 2.95$ ,  $P = 0.009$ ). We next examined the connectivity of the MTL and mPFC to the  
271 three large-scale brain networks. Both the MTL and mPFC showed significantly larger  
272 connectivity to brain areas that belong to the frontoparietal control network during the facing  
273 period relative to the targeting period (Fig. 5a,  $P < 0.01$ , voxel-wise threshold;  $P < 0.05$ ,

274 cluster-corrected). In contrast, the default mode network and dorsal attention network showed  
275 significantly larger connectivity to the MTL and mPFC in the targeting period compared to  
276 the facing period (Fig. 5b,  $P < 0.01$ , voxel-wise threshold;  $P < 0.05$ , cluster-corrected). These  
277 results suggest that both the MTL and mPFC changed their connectivity to the three  
278 functional networks across the two task periods. We next evaluated the task-based functional  
279 connectivity during each task period based on the three functional network masks (Fig. 5a, b).  
280 This ROI analysis revealed that the default mode network was positively correlated with the  
281 MTL ( $t(18) = 9.42$ ,  $P < 0.001$ ) and mPFC ( $t(18) = 10.63$ ,  $P < 0.001$ ) for both time periods  
282 with a significant increase in the targeting period (Fig. 5c & Fig. S6, top panel;  $F(1,72) =$   
283  $4.63$ ,  $P = 0.03$ ), regardless of the seeds (MTL or mPFC;  $F(1,72) = 0.24$ ,  $P = 0.62$ ). These  
284 results suggest that the default mode network contributes more to the retrieval of the target  
285 location than the self-location to an external reference during the facing period. In contrast,  
286 the frontoparietal control network showed significantly negative connectivity with the MTL  
287 ( $t(18) = -9.12$ ,  $P < 0.001$ ) and mPFC ( $t(18) = -10.43$ ,  $P < 0.001$ ) during both task periods,  
288 indicating that the frontoparietal control network works competitively with MTL and mPFC  
289 areas of the default mode network. This competitive effect was stronger during the targeting  
290 period (Fig. 5c & Fig. S6, middle panel;  $F(1,72) = 5.82$ ,  $P = 0.02$ ). Interestingly, despite both  
291 the MTL and mPFC being part of the default mode network, they showed opposite  
292 connectivity patterns to the dorsal attention network during both periods (Fig. 5c & Fig. S6,  
293 bottom panel;  $F(1,72) = 46.72$ ,  $P < 0.001$ ); the MTL positively with the network while the  
294 mPFC negatively correlated with it. The connectivity between the MTL and the dorsal  
295 attention network increased from the facing to targeting period ( $t(18) = 4.31$ ,  $P = 0.0004$ ).  
296 These results demonstrated that the dorsal attention network, which contains the superior  
297 parietal lobule (SPL) that represented egocentric target location (Fig. 4a), showed increased  
298 coupling with the MTL during the targeting period. On the other hand, the mPFC only

299 attenuated its amplitude of anti-correlated connectivity with the dorsal attention network,  
300 which may suggest that egocentric target location represented in the mPFC was not directly  
301 transmitted to the dorsal attention network. Considering the increased coupling between the  
302 mPFC and default mode network including MTL areas during the targeting period (Fig.  
303 5b&c), we hypothesize that the egocentric target location might be transferred from the  
304 mPFC to the SPL via the MTL.

## 305 **Discussion**

306 In this study, we examined neural representations of space defined by three objects and found  
307 that both the HPC and mPFC represented the object-based space around the participants.  
308 Interestingly, the HPC represented the object-based map when the participants locate their  
309 self-body in the environment constructed by the three objects, while the mPFC represented  
310 the map when the participants remembered the location of a target object relative to the self-  
311 body. These results suggest that the cognitive maps in different brain regions play different  
312 functional roles. In addition, during the targeting period, we found different preference in  
313 spatial element representation between the MTL and mPFC, more MTL regions reinstated  
314 allocentric self-location, while more mPFC regions represented egocentric target location  
315 relative to self-location. Increased functional connectivity was observed between the MTL  
316 and mPFC under the necessity of the retrieval of the target location from the stored memory  
317 (targeting period) compared to when they actually faced the reference object to locate their  
318 self-body (facing period). These results suggest that mental representations of the external  
319 world formed by the coherent space and its constituent elements may be shared in the default  
320 mode network including the MTL and mPFC. The special role of the mPFC in this scheme  
321 may be to select the object location based on the mnemonic information including the  
322 cognitive map and current self-location on it, which may be propagated from the MTL.

323 For the detection of “*map*” effect (Fig. 1b), the present task was designed to cancel  
324 out effects of a particular encoding experience related with the walking direction as well as a  
325 particular object identity that the participants viewed during the facing and targeting periods  
326 in each trial by balancing number of trials with each of those confounding factors in each  
327 map (see Methods). Therefore, the neural representation of the map information revealed by  
328 the RSA cannot be explained by individual perceived information in the present study.  
329 Moreover, the participants always stood on the center of the virtual environment during the

330 facing and targeting periods, during which the map effect was examined. Because of this task  
331 design, the map information does not directly indicate self-location information like place  
332 fields of place cells in the HPC (O'Keefe and Dostrovsky, 1971). On the other hand, the  
333 representations of place-fields are reportedly influenced by the animal's cognitive map, and  
334 the existence of cognitive maps could be most clearly demonstrated by a phenomenon known  
335 as "remapping", which reportedly occurs in populations of place cells in the rodent HPC  
336 (Moser et al., 2017). Therefore, it might be reasonable to interpret the map representations in  
337 the left mHPC during the facing period as experimental evidence of "remapping" of place  
338 cells in the human HPC even though the participants stood on the same position. However,  
339 holding this interpretation predicts that human place cells are localized in the left mHPC.  
340 This prediction is against consistent evidence from previous human studies that reported that  
341 the right HPC was more involved in encoding and retrieving spatial information than the left  
342 HPC (Abrahams et al., 1997; Maguire et al., 1997; Ekstrom et al., 2003; Doeller et al., 2008;  
343 Schinazi, 2013). The other possible interpretation for the map representation in the left  
344 mHPC is that it may encode an allocentric spatial relationship of the three objects itself. This  
345 interpretation is consistent with previous human imaging studies reporting contributions of  
346 the left HPC to the imagination of visual scenes, which could be constructed from multiple  
347 spatial elements (Addis et al., 2007; Bird et al., 2010). The specific role of the left HPC in  
348 relational memory was also reported in non-spatial information domains, including  
349 associative learning (Kumaran et al., 2009; Suarez-Jimenez et al., 2018) and social  
350 interactions (Tavares et al., 2015;). Taken together, it might be more reasonable to interpret  
351 that the clusters in the left mHPC represented a coherent space constructed by the multiple  
352 objects rather than its influence on representations of individual spatial elements such as self-  
353 location or head direction. RSA also revealed the involvement of the PRC and PHC in MTL  
354 signaling the object identity and egocentric view of their spatial layout, respectively, which



355 might be used for constructing the coherent map from its constituents in the left mHPC.  
356 Future studies should address how the coherent map can be constructed by multiple objects in  
357 the MTL.

358         In contrast to the facing period, during the targeting period, the representation of the  
359 map information was found in the mPFC but not in the HPC. In addition, the mPFC signaled  
360 the egocentric location of a targeting object, while the MTL concurrently signaled the  
361 allocentric self-location. Involvement of the mPFC in constructing goal-directed information  
362 in the current context is consistent with accumulating evidence showing that the mPFC  
363 contributes to decision making or action selection (Saxena et al., 1998; Gallagher et al., 1999;  
364 Feierstein, 2006; Spiers and Maguire, 2007; Kable and Glimcher, 2009; Young and Shapiro,  
365 2011; Balaguer et al., 2016; Yamada et al., 2018). These previous studies consistently  
366 supported the notion that the mPFC function becomes obvious when an appropriate selection  
367 requires mnemonic information in addition to incoming perceptual information (Bradfield,  
368 2015). In this study, together with perceptual information responsible for target object  
369 identity, mnemonic information such as the map information and allocentric self-location was  
370 required to solve the task. Considering that the MTL could provide all the necessary  
371 mnemonic information, a reasonable interpretation is that the mPFC was involved in the  
372 selection of one egocentric location among alternative locations rather than the recollection  
373 or generation of location information of a target object.

374         In addition to the HPC and mPFC, the map information has been observed in other  
375 brain areas such as the angular gyrus (Seghier, 2013; Price et al., 2016), lateral temporal  
376 gyrus (Karnath, 2001; Himmelbach et al., 2006), and precuneus (Cavanna and Trimble, 2006)  
377 that also belong to the default mode network. The brain areas in the default mode network,  
378 particularly the MTL sub-regions except for the PRC represented allocentric self-location

379 during the targeting period. On the other hand, RSA analysis showed that widely-distributed  
380 brain regions were involved in the representation of the egocentric target object location not  
381 only in the default mode network but also in the dorsal attention network and frontoparietal  
382 control network. The positive and negative functional connectivity between the dorsal  
383 attention network and the MTL and mPFC suggest that the egocentric target location signal is  
384 transmitted from the mPFC to the brain regions of the dorsal attention network, such as the  
385 SPL (Evans et al., 2016), via the MTL, which implies a pivotal functional role of MTL as a  
386 hub of mental representation of object signals.

387         Interestingly, the frontoparietal control network showed a strong negative correlation  
388 with both the MTL and mPFC during both periods, although the IPFC in the frontoparietal  
389 control network represented both the map information and egocentric direction during the  
390 targeting period. In addition, the IPFC represented walking direction as well as character  
391 identity during both the facing and targeting period. These results suggest that the IPFC  
392 computes the target location independently of the default mode network. The parallel  
393 contributions of the IPFC and MTL-mPFC in choosing the target location may reflect their  
394 different cognitive functions (Jimura et al., 2004). IPFC has long been considered as a center  
395 of executive functions (Funahashi, 2017; Miller et al., 2018) equipped with working memory  
396 (Andrews et al., 2011; Barbey et al., 2013; Brunoni and Vanderhasselt, 2014; Funahashi,  
397 2017). In human fMRI studies, the IPFC has been shown to contribute to the retrieval of task-  
398 relevant information from spatial memory when more systematic thinking is required  
399 (Epstein et al., 2017; Javadi et al., 2017). In this study, the behavioral task was designed to  
400 ensure participants neither actively maintained a spatial configuration of the human  
401 characters during the walking period nor any systematic strategy to solve the task, which was  
402 confirmed by the post-scanning test results. The greater signal for the cognitive map and the  
403 egocentric target location in the mPFC than that in the IPFC may indicate that the current task

404 was easy enough to allow participants to depend only on memory to exhibit top-ceiling  
405 performance (Epstein et al., 2017; Javadi et al., 2017).

406 In contrast to previous memory/navigation studies, which examined brain functions  
407 using spatial environments consisting of immobile landmarks (e.g., stores) and/or landscapes  
408 (e.g., mountains) (Bird et al., 2010; Woollett and Maguire, 2011; Schinazi et al., 2013;  
409 Chadwick et al., 2015; Brown et al., 2016), the present study used a spatial environment  
410 constructed by only mobile objects that could become targets and references of self-location  
411 as well as determine the space (i.e., map) around oneself. This task design allowed us to  
412 extract a mental representation of the spatial environment consisting of the minimum  
413 essential constituents. This reductionist method could be useful for future studies  
414 investigating the construction and functional mechanisms of a cognitive map because of its  
415 simplicity. One critical concern might be whether the findings discovered by this reductionist  
416 method can be applied to a more complicated cognitive map consisting of large numbers of  
417 immobile spatial elements, which could be learned through extensive explorations over a  
418 long time period (e.g., the city of London) (Woollett and Maguire, 2011). Another related  
419 concern might be whether our brain system holds only one cognitive map or multiple ones at  
420 a time (Meister and Buffalo, 2018). For example, we may hold an object-based cognitive map  
421 consisting of relevant mobile objects such as same species, predators, and foods, while we  
422 may also hold the other cognitive map consisting of landmarks, landscapes and other  
423 immobile objects such as trees. Future studies should address the relationships of different  
424 types of cognitive maps (e.g., mobile vs immobile, short-term vs. long-term) and their  
425 underlying neural mechanisms.

426 The present study discovered neural representations of the space specified by objects  
427 around us. This object-based cognitive map seems to interact with representation of self-  
428 location in HPC and mediate a selection of egocentric target-location in mPFC, which would

429 serve for leading us to the goal position. In addition to the spatial navigation, an existence of  
430 the object-based cognitive map may equip us with a space representation for persons  
431 separately from the background, which may serve for our social interactions (Damasio et al.,  
432 1994; Stolk et al., 2015) as well as the encoding and retrieval of episodic memory (Tulving,  
433 2002; Squire and Wixted, 2011).

434

## 435 **Supplemental Information**

436 Supplemental Information includes six figures, two tables and two videos. The videos contain  
437 trial examples for Day 1 and Day 2. In the video of day 1, please note we only used examples  
438 of correct trials in which a green photo border was shown as feedback after response was  
439 made. File size: 21.5 MB; Video duration: 1.23 minute; File format: .mp4; Video codec:  
440 H.264; Aspect ratio: 1024 x 768.

## 441 **Author Contributions**

442 B.Z. and Y.N made the experimental design; B.Z. conducted all experiments and data  
443 analysis under supervision of Y.N.; B.Z. and Y.N. wrote the paper.

444

## 445 **Acknowledgments**

446 The present study was funded by National Natural Science Foundation of China Grant  
447 31421003 (to Y.N.). Computational work was supported by resources provided by the High-  
448 performance Computing Platform of Peking University. We thank Li Sheng and Sun Pei for  
449 helpful discussions, we also thank Koji Jimura, Rei Akaishi and Cen Yang for comments on  
450 an early version of the manuscript.

451 **Main figures**

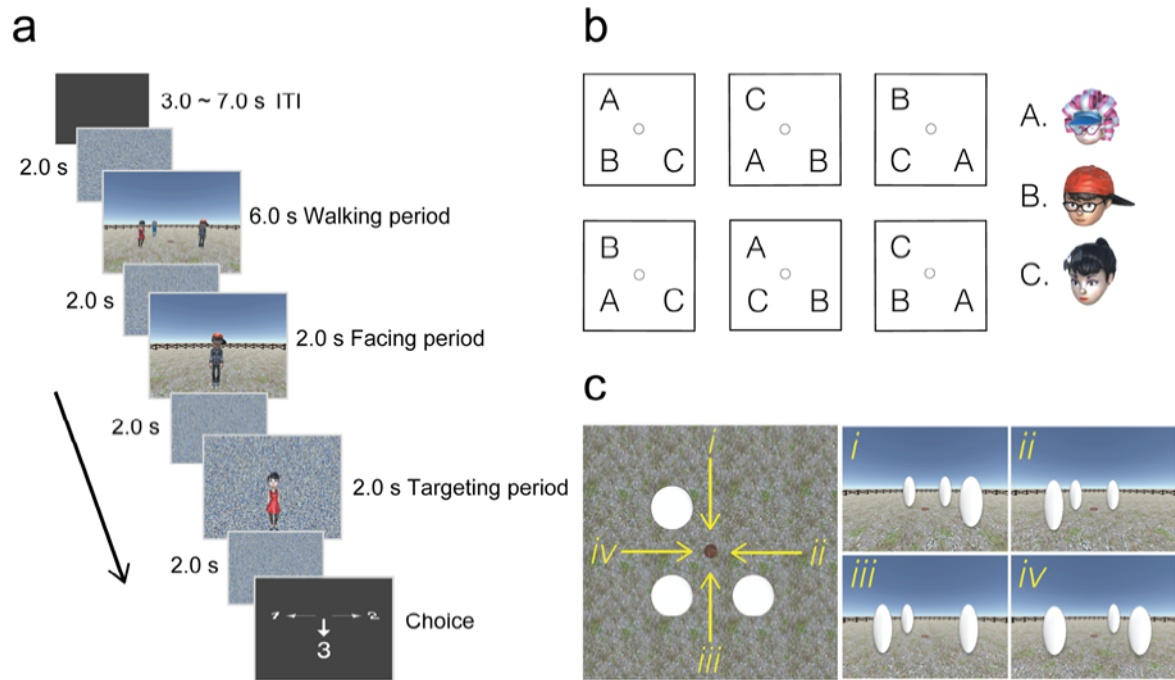

452

453 Figure 1: Task design. (a) spatial-memory task. Each trial consisted of three periods. In the  
454 walking period, participants walked toward three human characters using the first-person  
455 perspective and stopped on a wood plate. In the facing period, one of the human characters  
456 was presented, indicating the participant's current self-orientation. In the targeting period, a  
457 photo of another character was presented on the scrambled background. The participants  
458 chose the direction of the target character relative to their body upon presentation of a  
459 response cue. (b) Maps were defined by the relative position of the three human characters,  
460 while the unfilled dot represents the wood plate. (c) The walking directions were defined by  
461 the spatial layout of the three human characters from the participant's first-person  
462 perspective.

463

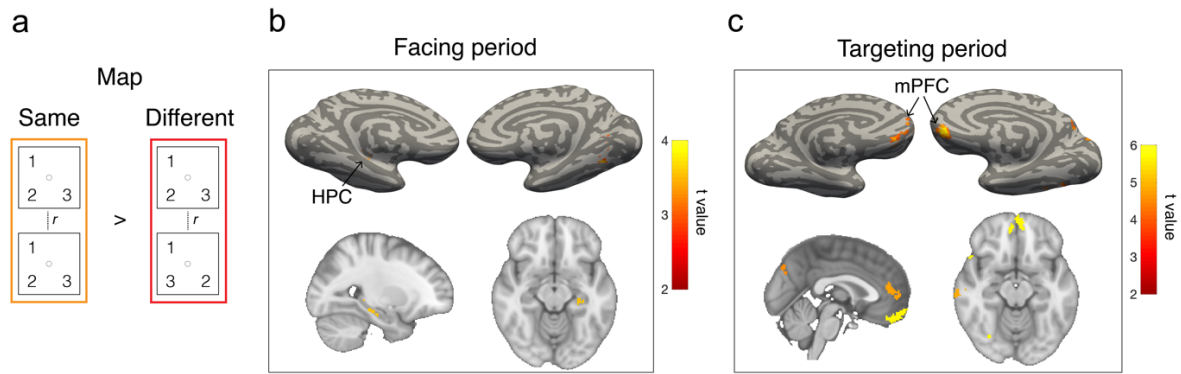

464

465 Figure 2: Neural representation of the map information in MTL and mPFC. (a) Schematic  
466 representation of decoding the cognitive map using RSA. (b) In the facing period, RSA  
467 revealed a cluster in the left middle HPC (mHPC; MNI coordinates: -28,-27,-16; shown on  
468 sagittal and transverse section) within the MTL ( $P < 0.01$ , initial threshold;  $P < 0.05$ , cluster-  
469 corrected; shown on surface). (c) In the targeting period, clusters were revealed in the mPFC  
470 but not in the MTL ( $P < 0.001$ , initial threshold;  $P < 0.05$ , cluster-corrected). A peak was  
471 revealed in the rectus within the mPFC (t value: 5.62; MNI coordinates: 4, 50, -18).

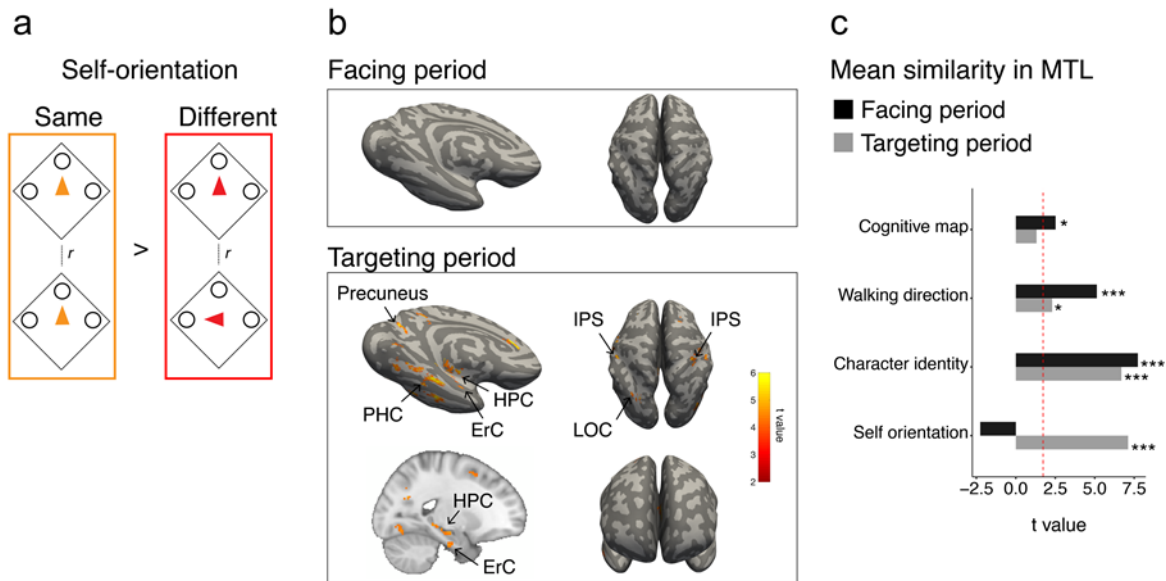

472

473 Figure 3: Neural representation of self-orientation on cognitive map. (a) Schematic  
474 representation of decoding participants' self-orientation. (b) In the facing period, no cluster  
475 was revealed even with the use of a more liberal threshold ( $P < 0.01$ , initial threshold;  $P <$   
476  $0.05$ , cluster-corrected). In the targeting period, clusters were revealed in the MTL (bilateral  
477 HPC, PHC, and left ErC) and self-motion areas (inferior parietal cortex, RSC, and lateral  
478 occipital cortex). (c) The averaged multi-voxel pattern similarities of the MTL sub-regions  
479 (bilateral HPC, PHC and left ErC) based on four spatial parameters. Group level statistics  
480 were assessed using the one-tailed t-test. Red dashed line indicates the  $p < 0.01$  threshold. \*  
481 indicates  $P < 0.01$ , \*\*\* indicates  $P < 0.001$ .

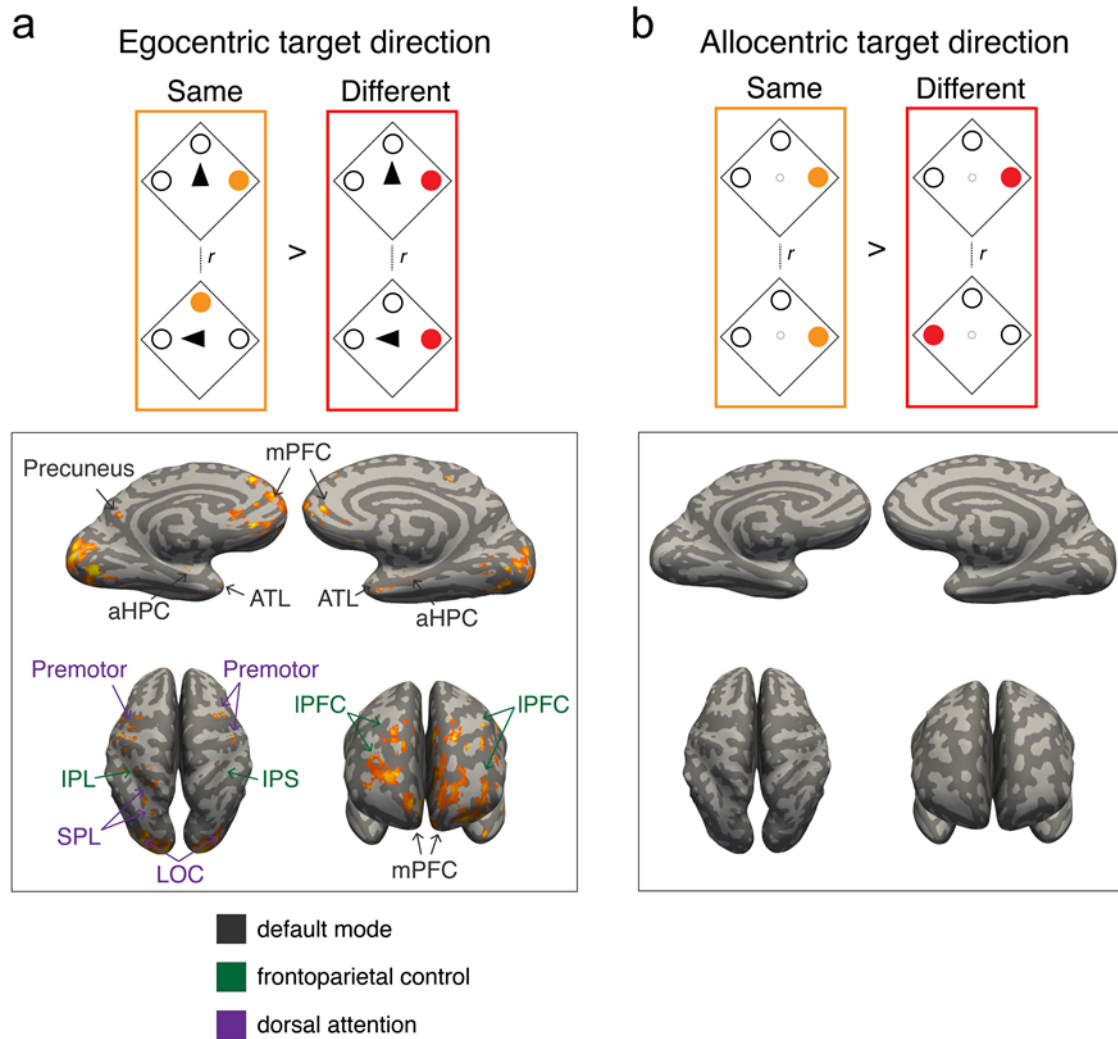

482

483 Figure 4: Neural representation of retrieved egocentric target location. (a) Top panel:

484 Schematic representation of decoding the allocentric direction of a target character. Bottom

485 panel: No clusters were revealed even with the use of a liberal threshold ( $P < 0.01$ , initial

486 threshold;  $P < 0.05$ , cluster-corrected). (b) Top panel: Schematic representation of decoding

487 the egocentric direction of a target character. Bottom panel: Clusters were revealed across a

488 wide range of brain areas ( $P < 0.001$ , initial threshold;  $P < 0.05$ , cluster-corrected). Many of

489 the clusters belonged to one of the following three functional networks: the default mode

490 network, frontoparietal control network, and dorsal attention network.



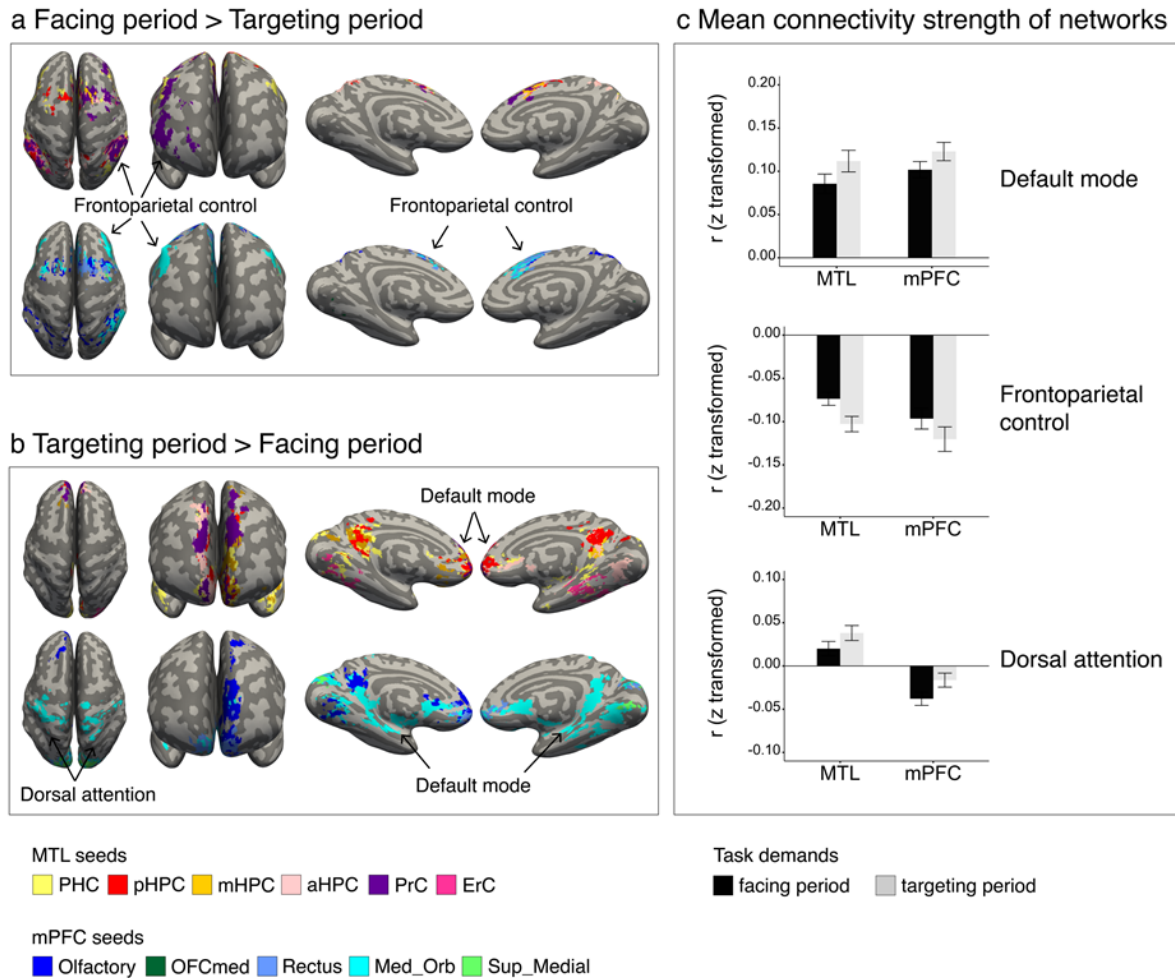

491

492 Figure 5: Increased default-mode network connectivity while locating a target compared with

493 locating oneself. Six MTL sub-regions and five mPFC sub-regions were used as anatomical

494 seeds that were highlighted by different colors. All the connectivity brain maps overlapped

495 and were projected on the brain surface. (a) The frontoparietal control network showed

496 enhanced connectivity strength with the MTL and mPFC in the facing period compared to the

497 targeting period ( $P < 0.01$ , initial threshold;  $P < 0.05$ , cluster-corrected). (b) The default mode

498 network and dorsal attention network showed enhanced connectivity strength with the MTL

499 and mPFC in the targeting period compared to the facing period ( $P < 0.01$ , initial threshold;  $P$

500  $< 0.05$ , cluster-corrected). (c) The mean connectivity strength of MTL and mPFC sub-regions

501 with three networks, respectively. Note that the two default model network masks were made

502 with the MTL and mPFC excluded, respectively. The masks were used to examine the

503 connectivity between the MTL and mPFC with the remaining areas of the default mode  
504 network.

505 **Methods**

506

507 **Participants**

508 Nineteen right-handed university students with normal or corrected-to-normal vision were  
509 recruited from Peking University (12 females, 7 males). The average age of the participants  
510 was 24.9 years (range: 18–30 years). All participants had no history of psychiatric or  
511 neurological disorders and gave their written informed consent prior to the start of the  
512 experiment, which was approved by the Research Ethics Committee of Peking University.

513

514 **Task design**

515 *Virtual environment.* We programmed a 3D virtual environment using Unity software (Unity  
516 Technologies, San Francisco). The environment was designed with a circular fence as a  
517 boundary (48 virtual meters in diameter), a flat grassy ground, a uniform blue sky, and with a  
518 wood plate surrounded by four vertices of a square placed in the center (Fig. 1b, 4.7 virtual  
519 meters for side length). Three human characters (Mixamo, San Francisco,  
520 <https://www.mixamo.com>) were placed on three of the vertices in each trial. A map was  
521 defined by the relative relationship of the three human characters (Fig. 1b). From the six  
522 possible maps, three of them were pseudo-randomly selected for each participant, and were  
523 the only environmental cues relevant to the task requirement, no distal cues were used outside  
524 the boundary. Participants performed the task using the first-person perspective with a 90°  
525 field of view (aspect ratio = 4:3), they had never seen a top-down view of the virtual  
526 environment.

527 *Walking period.* Participants walked from one of four starting locations near the circular  
528 boundary (4 virtual meters from the boundary) toward the human characters (Fig. 1c) and  
529 stopped on the wood plate. The visual stimuli (spatial environment viewed from first-person

530 perspective) were determined by the combination of the map and walking direction, in other  
531 words, each map was presented by four different visual stimuli that were determined by the  
532 starting position (Fig. 1c). Importantly, participants were blinded to the map concept  
533 throughout the task. The walking period lasted for 6.0 s, during which each character had a  
534 20.6% probability of nodding its head at a random time point between the start and end of  
535 walking. There was a 50%, 38.9%, 10.2%, and 0.9% probability for 0, 1, 2, and 3 characters  
536 to nod head in each trial; we subjectively selected a 20.6% head-nodding probability for each  
537 character to ensure an approximately equal number of trials with head-nodding and no head-  
538 nodding. During the walking period, participants were required to pay attention to the heads  
539 of the human characters rather than to memorize their spatial arrangement. The height of the  
540 participants was 1.8 virtual meters from the ground, which was the same as that of the human  
541 characters. No response was required during the walking period.

542 Two tasks were completed in two consecutive days. On day 1, the participants  
543 performed an HND task that did not include spatial-memory trials. On day 2, participants  
544 performed a spatial-memory task that included 90% of spatial-memory trials and 10% of  
545 HND trials under MRI scanning. Both tasks contain a walking period at the beginning of  
546 each trial; therefore, it was impossible to predict the trial-type. Participants were told that  
547 remuneration depended only on the performance in the HND trials but were encouraged to  
548 perform both trial-types as best as they could (videos of trial examples are available online  
549 for both tasks).

550 *Head-nodding detection (HND) task.* Participants performed 144 randomly ordered HND  
551 trials in a behavioral experimental room. In each trial, a photo of one of the characters was  
552 presented on a screen after the walking period, and participants were asked to indicate  
553 whether the character nodded its head or not (Fig. S1a). For this task, there was a 50% chance  
554 that the character in the presented photo nod head. Feedback was given after the participants

555 had responded with either green (correct) or red (incorrect) photo border. The stimuli were  
556 rendered on a PC and presented on a 27-inch LCD monitor (ViewSonic XG2730) with a  
557 screen resolution of 1024 x 768. The HND task was used to examine whether participants  
558 paid attention to head-nodding rather than memorizing the spatial arrangement of the  
559 characters, which would be indicated by high success rates in the head-nodding test.

560 *Spatial-memory task.* During this task, participants performed 144 spatial-memory trials  
561 (90%) and 16 HND trials (10%) that lasted ~ 70 min in an MRI scanner. In each trial,  
562 participants experienced a “facing period” and a “targeting period” sequentially after the  
563 walking period. In the facing period, their self-orientation was changed immediately to one of  
564 the human characters (facing-character) without viewpoint transition, and a character with the  
565 environment background was presented for 2.0 s with the other two characters being  
566 invisible, the participants were instructed to face the character. In the targeting period, a  
567 photo of another character (targeting-character) was presented as a target on a scrabbled  
568 background for 2.0 s. Each of the three experimental periods was followed by a 2.0-s delay  
569 (noise screen). At the end of each trial, participants indicated the direction of the target  
570 character relative to their self-body by pressing a button when a cue presented on the screen;  
571 no feedback was shown for both trial-types (Fig. 1a). The spatial-memory task contained four  
572 experimental sessions, each containing a spatial information combination of 3 maps x 4  
573 walking directions x 3 facing-character identities in each session, with targeting-characters  
574 balanced across sessions. After scanning, all participants completed a post-scanning  
575 interview and reported the strategy they used to perform the task (Table. S2).

576

### 577 **fMRI data acquisition**

578 Imaging data were collected using a 3T Siemens Prisma scanner equipped with a 20-channel  
579 receiver head coil. Functional data were acquired with a Multi-band Echo Planer imaging

580 (EPI) sequence (TR = 2000 ms, TE = 30 ms, matrix size:  $112 \times 112 \times 62$ , flip angle:  $90^\circ$ , gap  
581 = 0 mm; resolution:  $2 \times 2 \times 2.3 \text{ mm}^3$ , number of slices: 62, slice thickness: 2 mm, slice  
582 orientation: transversal). A high-resolution T1-weighted three-dimensional anatomical data  
583 set was collected to aid in registration (MPRAGE, TR = 2530 ms, TE = 2.98 ms, matrix size:  
584  $448 \times 512 \times 192$ , flip angle:  $7^\circ$ , resolution:  $0.5 \times 0.5 \times 1 \text{ mm}^3$ , number of slices: 192, slice  
585 thickness: 1 mm, slice orientation: sagittal). During scanning, experimental stimuli were  
586 presented through a Sinorad LCD projector (Shenzhen Sinorad Medical Electronics) onto a  
587 33-inch rear-projection screen located over the subject's head with a resolution of  $1024 \times 768$   
588 and viewed with an angled mirror positioning on the head coil.

589

### 590 **fMRI preprocessing**

591 Functional data for each session were preprocessed independently using FSL FEAT  
592 (FMRIB's Software Library, version 6.00, <https://fsl.fmrib.ox.ac.uk/fsl/fslwiki>; Woolrich et  
593 al., 2001; Woolrich et al., 2004). For each session, the first three functional volumes were  
594 discarded to allow for T1 equilibration, and the remaining functional volumes were slice-time  
595 corrected, realigned to the first image, and high-pass filtered at 100 s. For group-level  
596 statistics, each session's functional data were registered to a T1-weighted standard image  
597 (MNI152) using FSL FLIRT (Jenkinson and Smith, 2001), and this procedure also resampled  
598 the functional voxels into a  $2 \times 2 \times 2 \text{ mm}$  resolution. For RSA, data were left unsmoothed to  
599 preserve any fine-grained spatial information (Chadwick et al., 2012). For functional  
600 connectivity analysis, data were smoothed using a 5 mm FWHM Gaussian kernel and were  
601 high-pass filtered at 0.01 Hz to remove low-frequency signal drifts.

602

### 603 **Anatomical masks**

604 We manually delineated the MTL, including the HPC, PHC, PRC, and ERC on each  
605 participant's native space using established protocols (Insausti et al., 1998; Pruessner et al.,  
606 2000; Pruessner et al., 2002; Duvernoy, 2005), as well as a delineating software ITK-SNAP  
607 ([www.itksnap.org](http://www.itksnap.org)). The HPC was further divided into its anterior, middle, and posterior parts  
608 using anatomical landmarks of each participant given the anatomical and functional  
609 variability along the HPC long axis (Poppenk et al., 2013). For PFC sub-regions, we used the  
610 AAL template (Rolls et al., 2015), and selected five mPFC sub-regions for ROI-analysis,  
611 which included the rectus, medial orbital gyrus (OFCmed), medial orbital frontal gyrus  
612 (Med\_Orb), superior medial frontal gyrus (Sup\_Med), and olfactory cortex. All ROIs were  
613 resampled and aligned with the functional volumes, and voxels outside of the brain were  
614 excluded.

615

### 616 **Representational similarity analysis (RSA)**

617 Task-relevant information was decoded using RSA. We tried to dissociate the neural effect of  
618 facing and targeting period based on 4 s duration from each period onset to the end of  
619 following noise period (Zeithamova et al., 2017). First, the trial-based multi-voxel activity  
620 patterns of two periods were obtained by creating two separate univariate general linear  
621 models (GLM). In each GLM, the 4 s blood-oxygen-level-dependent (BOLD) signals of 36  
622 trials (a session) were modeled using boxcar regressors. In addition to the 36 trial-based  
623 regressors of interest, nuisance regressors were included, which included twelve regressors  
624 for modeling the visual patterns of the walking period determined by the maps and walking  
625 directions, three for modeling the character identities in the remaining period (for example, in  
626 the facing period GLM, three targeting characters were specified as nuisance regressors  
627 rather than the facing characters), four for modeling head-nodding detection trials, three for  
628 modeling 3 directional cues in the response period, and six motion parameters. This

629 procedure generated 36 trial-based multi-voxel patterns in participant's native space (2 x 2 x  
630 2.3 mm voxels) for each period, those multi-voxel patterns were normalized prior to  
631 subsequent analysis by subtracting the grand mean pattern of the 36 multi-voxel patterns for  
632 each session (Vass and Epstein, 2013).

633 Searchlight-based RSA. Next, we computed the representational similarity for each  
634 spatial information based on the multi-voxel patterns using a searchlight-based RSA (Libby  
635 et al., 2014; Chadwick et al., 2015), which was conducted using custom Matlab (version  
636 R2018b, [www.mathworks.com/matlab/](http://www.mathworks.com/matlab/)) scripts. In detail, a sphere with a 6 mm radius was  
637 constructed (85 voxels per sphere) for each brain voxel, and the spheres near the edge of the  
638 brain with fewer than ten voxels were excluded from the analysis. The activity parameters  
639 within each sphere were extracted from each of the 36 multi-voxel patterns, resulting in a 36-  
640 column by n-row (number of voxels within the sphere) matrix. The pattern similarity was  
641 then calculated between each column-by-column pair using Pearson's correlation, and was  
642 normalized using Fisher's r-to-z transformation. This procedure finally generated a 36-by-36  
643 correlation matrix for each period in each brain voxel. Next, given that a multi-voxel pattern  
644 contains the combination of multiple spatial information, we conducted a GLM for each  
645 correlation matrix by specifying multiple categorical regressors to rule out potential  
646 influences. Each spatial representation represented specific spatial information and used  
647 either indicator "1 (same)" or "0 (different)" that corresponded with the correlation  
648 coefficient of a given column-to-row cell of the correlation matrix. For the facing period, the  
649 GLM contained five categorical regressors, which included the (1) "map", (2) "walking  
650 direction", and (3) "facing-character identity". Since the participants reported thinking about  
651 their bodies rotating between the walking direction and self-orientation relative to the  
652 environment, we also added the (4) "rotation angle" (turn left/right 45°, turn left/right 135°),  
653 and (5) their "self-orientation" into the GLM. For the targeting period, seven regressors were



654 built, which included: (1) “map”, (2) “walking direction”, (3-4) participants’ “rotation angle”  
655 and “self-orientation”, (5) “targeting-character identity”, and (6-7) “egocentric and allocentric  
656 position of target-character”. It is important to note that the “facing-character identity” was  
657 not included in the targeting period GLM since the effect of each facing character was  
658 regressed out in the GLM computing of multi-voxel activity patterns.  $r^2$  was computed and  
659 ranged from 0 to 0.03 for the facing period GLM, and 0 to 0.04 for the targeting period GLM  
660 (Table S1). Each regressor’s parameter was then assigned to the center voxel of each sphere  
661 so that a whole-brain statistical parametric mapping could be generated for each spatial  
662 information for each period, with those spatial representations being finally averaged across  
663 the four scanner sessions. By using this method, spatial information should be successfully  
664 decoded if the regressors stably predict the correlation coefficients in any voxels. A  
665 permutation test was used to examine the spatial representation stability across the subjects  
666 (Nichols and Holmes, 2002; Winkler et al., 2014).

667 *ROI-based RSA.* To validate the spatial representations, we further conducted an  
668 independent RSA using anatomical ROIs of MTL and PFC sub-regions. We reasoned that  
669 since searchlight analysis identifies the spatial representations as clusters in small portions of  
670 anatomical regions, if those representations are stable enough, the corresponding anatomical  
671 regions, on average, should show a clear increasing tendency in similarity when spatial  
672 information between trial-pairs are similar compared to different such that matching to the  
673 searchlight results. To test this, we separated each ROI into the left and right hemispheres and  
674 generated 22 anatomical masks (12 for the MTL and 10 for the mPFC). The mPFC masks  
675 were normalized into the participants’ native space. The RSA procedure for each ROI was  
676 similar to searchlight analysis, which produced a 36-by-36 correlation matrix for each period.  
677 Next, for each spatial information, the correlation matrix elements were binarized into “same  
678 (1)” and “different (0)” conditions. A discrimination score was computed by comparing the

679 difference in the means of two conditions, and thus all matrix elements were used. It is  
680 important to note that this procedure is different from the previously reported method where  
681 the irrelevant information was controlled. Nevertheless, the aim of our analysis was to  
682 maintain an efficient number of samples when computing the correlation mean due to the  
683 complex nature of the task. The discrimination scores were averaged across the sessions and  
684 were submitted to one-tailed one-sample t-tests against change (zero).

685

### 686 **Functional connectivity (FC) analysis**

687 To investigate the functional networks for different task demands, we examined the whole-  
688 brain FC using each MTL and mPFC sub-region as seed. In detail, based on the preprocessed  
689 functional data, we further removed the nuisance covariates by creating a GLM that specified  
690 the signal averaged over the lateral ventricles, white matter, and whole brain, six motion  
691 parameters, and their derivatives as regressors. The residual signal was bandpass-filtered,  
692 leaving signals within the frequency range 0.01 to 0.1 Hz, and was shifted by two TR  
693 intervals (4 s) for subsequent analysis (Ranganath et al., 2005; Tompariy and Davachi, 2017).  
694 Next, for each anatomical mask, a regional time course was computed by extracting and  
695 averaging signals over the mask from each facing and targeting period. We then correlated  
696 the time course with every voxel in the rest of the brain, resulting in a whole-brain correlation  
697 map for each period. The correlation maps were averaged across four scanning sessions and  
698 were eventually submitted to a one-tailed t-test for group level statistics.

699

### 700 **Statistics**

701 The significance of group level statistics was assessed by performing a one-tailed one-sample  
702 t-test. For searchlight-based RSA, we used an initial threshold of  $p < 0.001$ . If no clusters  
703 were revealed, a more liberal threshold of  $p < 0.01$  was used. For FC analysis, an initial

704 threshold of  $p < 0.01$  was used to identify robust network patterns. The reliability of  
705 significant effects was examined using a non-parametric statistical inference that does not  
706 make assumptions about the distribution of the data, the test was conducted with the FSL  
707 randomise package (version v2.9, <http://fsl.fmrib.ox.ac.uk/fsl/fslwiki/Randomise>)(Winkler et  
708 al., 2014) using 5000 random sign-flips and threshold-free clustering. We then reported  
709 voxels that were significant at  $p < 0.05$  after correcting for multiple comparisons across the  
710 entire brain. For other analyses, data distributions were assumed to be normal without formal  
711 tests. Analysis of variance (ANOVA) was used to test the difference between experimental  
712 conditions; the one-tailed t test was used to test the significance of each anatomical mask in  
713 ROI-based RSA.  
714

715 **Reference**

716

717 Abrahams, S., Pickering, A., Polkey, C. E., & Morris, R. G. (1997). Spatial memory deficits  
718 in patients with unilateral damage to the right hippocampal  
719 formation. *Neuropsychologia*, 35(1), 11-24.

720

721 Andrews, S. C., Hoy, K. E., Enticott, P. G., Daskalakis, Z. J., & Fitzgerald, P. B. (2011).  
722 Improving working memory: the effect of combining cognitive activity and anodal  
723 transcranial direct current stimulation to the left dorsolateral prefrontal cortex. *Brain*  
724 *stimulation*, 4(2), 84-89.

725

726 Addis, D. R., Wong, A. T., & Schacter, D. L. (2007). Remembering the past and imagining  
727 the future: common and distinct neural substrates during event construction and  
728 elaboration. *Neuropsychologia*, 45(7), 1363-1377.

729

730 Barbey, A. K., Koenigs, M., & Grafman, J. (2013). Dorsolateral prefrontal contributions to  
731 human working memory. *cortex*, 49(5), 1195-1205.

732

733 Brunoni, A. R., & Vanderhasselt, M. A. (2014). Working memory improvement with non-  
734 invasive brain stimulation of the dorsolateral prefrontal cortex: a systematic review and meta-  
735 analysis. *Brain and cognition*, 86, 1-9.

736

737 Bird, C. M., Capponi, C., King, J. A., Doeller, C. F., & Burgess, N. (2010). Establishing the  
738 boundaries: the hippocampal contribution to imagining scenes. *Journal of*  
739 *Neuroscience*, 30(35), 11688-11695.

740

741 Buffalo, E.A. (2015). Bridging the gap between spatial and mnemonic views of the  
742 hippocampal formation. *Hippocampus* 25, 713-718.

743

744 Balaguer, J., Spiers, H., Hassabis, D., & Summerfield, C. (2016). Neural mechanisms of  
745 hierarchical planning in a virtual subway network. *Neuron*, 90(4), 893-903.

746

747 Bradfield, L. A., Dezfouli, A., van Holstein, M., Chieng, B., & Balleine, B. W. (2015).  
748 Medial orbitofrontal cortex mediates outcome retrieval in partially observable task  
749 situations. *Neuron*, 88(6), 1268-1280.

750

751 Brown, T. I., Carr, V. A., LaRocque, K. F., Favila, S. E., Gordon, A. M., Bowles, B., ... &  
752 Wagner, A. D. (2016). Prospective representation of navigational goals in the human  
753 hippocampus. *Science*, 352(6291), 1323-1326.

754

755 Cavanna, A.E., and Trimble, M.R. (2006). The precuneus: a review of its functional anatomy  
756 and behavioural correlates. *Brain : a journal of neurology* 129, 564-583.

757

758 Campbell, K.L., Madore, K.P., Benoit, R.G., Thakral, P.P., and Schacter, D.L. (2018).  
759 Increased hippocampus to ventromedial prefrontal connectivity during the construction of  
760 episodic future events. *Hippocampus* 28, 76-80.

761

762 Chadwick, M. J., Jolly, A. E., Amos, D. P., Hassabis, D., & Spiers, H. J. (2015). A goal  
763 direction signal in the human entorhinal/subicular region. *Current Biology*, 25(1), 87-92.

764  
765 Chadwick, M. J., Bonnici, H. M., & Maguire, E. A. (2012). Decoding information in the  
766 human hippocampus: a user's guide. *Neuropsychologia*, 50(13), 3107-3121.  
767  
768 Duvernoy, H. M. (2005). *The human hippocampus: functional anatomy, vascularization and*  
769 *serial sections with MRI*. Springer Science & Business Media.  
770  
771 Damasio, H., Grabowski, T., Frank, R., Galaburda, A.M., and Damasio, A.R. (1994). The  
772 return of Phineas Gage: clues about the brain from the skull of a famous patient. *Science* 264,  
773 1102-1105.  
774  
775 Doeller, C. F., King, J. A., & Burgess, N. (2008). Parallel striatal and hippocampal systems  
776 for landmarks and boundaries in spatial memory. *Proceedings of the National Academy of*  
777 *Sciences*, 105(15), 5915-5920.  
778  
779 Ekstrom, A.D., Kahana, M.J., Caplan, J.B., Fields, T.A., Isham, E.A., Newman, E.L., and Fried, I.  
780 (2003). Cellular networks underlying human spatial navigation. *Nature* 425, 184-188.  
781  
782 Eichenbaum, H. (2017). The role of the hippocampus in navigation is memory. *Journal of*  
783 *neurophysiology* 117, 1785-1796.  
784  
785 Epstein, R.A., Patai, E.Z., Julian, J.B., and Spiers, H.J. (2017). The cognitive map in humans:  
786 spatial navigation and beyond. *Nature neuroscience* 20, 1504-1513.  
787  
788 Evans, T., Bicanski, A., Bush, D., & Burgess, N. (2016). How environment and self-motion  
789 combine in neural representations of space. *The Journal of physiology*, 594(22), 6535-6546.  
790  
791 Feierstein, C. E., Quirk, M. C., Uchida, N., Sosulski, D. L., & Mainen, Z. F. (2006).  
792 Representation of spatial goals in rat orbitofrontal cortex. *Neuron*, 51(4), 495-507.  
793  
794 Funahashi, S. (2017). Prefrontal Contribution to Decision-Making under Free-Choice  
795 Conditions. *Frontiers in neuroscience* 11, 431.  
796  
797 Gaesser, B., Spreng, R. N., McLelland, V. C., Addis, D. R., & Schacter, D. L. (2013).  
798 Imagining the future: evidence for a hippocampal contribution to constructive  
799 processing. *Hippocampus*, 23(12), 1150-1161.  
800  
801 Gallagher, M., McMahan, R. W., & Schoenbaum, G. (1999). Orbitofrontal cortex and  
802 representation of incentive value in associative learning. *Journal of Neuroscience*, 19(15),  
803 6610-6614.  
804  
805 Himmelbach, M., Erb, M., and Karnath, H.O. (2006). Exploring the visual world: the neural  
806 substrate of spatial orienting. *NeuroImage* 32, 1747-1759.  
807  
808 Hargreaves, E.L., Rao, G., Lee, I., and Knierim, J.J. (2005). Major dissociation between  
809 medial and lateral entorhinal input to dorsal hippocampus. *Science* 308, 1792-1794.  
810  
811 Hassabis, D., & Maguire, E. A. (2007). Deconstructing episodic memory with  
812 construction. *Trends in cognitive sciences*, 11(7), 299-306.  
813

- 814 Insausti, R., Juottonen, K., Soininen, H., Insausti, A. M., Partanen, K., Vainio, P., ... &  
815 Pitkänen, A. (1998). MR volumetric analysis of the human entorhinal, perirhinal, and  
816 temporopolar cortices. *American Journal of Neuroradiology*, 19(4), 659-671.  
817
- 818 Javadi, A.H., Emo, B., Howard, L.R., Zisch, F.E., Yu, Y., Knight, R., Pinelo Silva, J., and  
819 Spiers, H.J. (2017). Hippocampal and prefrontal processing of network topology to simulate  
820 the future. *Nature communications* 8, 14652.  
821
- 822 Jenkinson, M., & Smith, S. (2001). A global optimisation method for robust affine  
823 registration of brain images. *Medical image analysis*, 5(2), 143-156.  
824
- 825 Jimura, K., Konishi, S., and Miyashita, Y. (2004). Dissociable concurrent activity of lateral  
826 and medial frontal lobe during negative feedback processing. *NeuroImage* 22, 1578-1586.  
827
- 828 Karnath, H. O. (2001). New insights into the functions of the superior temporal  
829 cortex. *Nature Reviews Neuroscience*, 2(8), 568.  
830
- 831 Kumaran, D., Summerfield, J. J., Hassabis, D., & Maguire, E. A. (2009). Tracking the  
832 emergence of conceptual knowledge during human decision making. *Neuron*, 63(6), 889-901.  
833
- 834 Kriegeskorte, N., Goebel, R., & Bandettini, P. (2006). Information-based functional brain  
835 mapping. *Proceedings of the National Academy of Sciences*, 103(10), 3863-3868.  
836
- 837 Kriegeskorte, N., Mur, M., Ruff, D. A., Kiani, R., Bodurka, J., Esteky, H., ... & Bandettini, P.  
838 A. (2008). Matching categorical object representations in inferior temporal cortex of man and  
839 monkey. *Neuron*, 60(6), 1126-1141.  
840
- 841 Kable, J.W., and Glimcher, P.W. (2009). The neurobiology of decision: consensus and  
842 controversy. *Neuron* 63, 733-745.  
843
- 844 Konishi, S., Wheeler, M.E., Donaldson, D.I., and Buckner, R.L. (2000). Neural correlates of  
845 episodic retrieval success. *NeuroImage* 12, 276-286.  
846
- 847 Libby, L. A., Hannula, D. E., & Ranganath, C. (2014). Medial temporal lobe coding of item  
848 and spatial information during relational binding in working memory. *Journal of*  
849 *Neuroscience*, 34(43), 14233-14242.  
850
- 851 Meister, M.L.R., and Buffalo, E.A. (2018). Neurons in primate entorhinal cortex represent  
852 gaze position in multiple spatial reference frames. *The Journal of neuroscience : the official*  
853 *journal of the Society for Neuroscience*.  
854
- 855 Miller, E. K., Lundqvist, M., & Bastos, A. M. (2018). Working Memory 2.0. *Neuron*, 100(2),  
856 463-475.  
857
- 858 Moser, E.I., Moser, M.B., and McNaughton, B.L. (2017). Spatial representation in the  
859 hippocampal formation: a history. *Nature neuroscience* 20, 1448-1464.  
860

- 861 Maguire, E. A., Frackowiak, R. S., & Frith, C. D. (1997). Recalling routes around London:  
862 activation of the right hippocampus in taxi drivers. *Journal of neuroscience*, 17(18), 7103-  
863 7110.
- 864
- 865 McCormick, C., Ciaramelli, E., De Luca, F., and Maguire, E.A. (2018). Comparing and  
866 Contrasting the Cognitive Effects of Hippocampal and Ventromedial Prefrontal Cortex  
867 Damage: A Review of Human Lesion Studies. *Neuroscience* 374, 295-318.
- 868
- 869 Nakazawa, K., Quirk, M.C., Chitwood, R.A., Watanabe, M., Yeckel, M.F., Sun, L.D., Kato,  
870 A., Carr, C.A., Johnston, D., Wilson, M.A., et al. (2002). Requirement for hippocampal CA3  
871 NMDA receptors in associative memory recall. *Science* 297, 211-218.
- 872
- 873 Nichols, T. E., & Holmes, A. P. (2002). Nonparametric permutation tests for functional  
874 neuroimaging: a primer with examples. *Human brain mapping*, 15(1), 1-25.
- 875
- 876 Naya, Y., and Suzuki, W.A. (2011). Integrating what and when across the primate medial  
877 temporal lobe. *Science* 333, 773-776.
- 878
- 879 Naya, Y., Yoshida, M., and Miyashita, Y. (2001). Backward spreading of memory-retrieval  
880 signal in the primate temporal cortex. *Science* 291, 661-664.
- 881
- 882 O'Keefe, J., & Dostrovsky, J. (1971). The hippocampus as a spatial map: preliminary  
883 evidence from unit activity in the freely-moving rat. *Brain research*.
- 884
- 885 Pruessner, J. C., Li, L. M., Serles, W., Pruessner, M., Collins, D. L., Kabani, N., ... & Evans,  
886 A. C. (2000). Volumetry of hippocampus and amygdala with high-resolution MRI and three-  
887 dimensional analysis software: minimizing the discrepancies between laboratories. *Cerebral*  
888 *cortex*, 10(4), 433-442.
- 889
- 890 Pruessner, J. C., Köhler, S., Crane, J., Pruessner, M., Lord, C., Byrne, A., ... & Evans, A. C.  
891 (2002). Volumetry of temporopolar, perirhinal, entorhinal and parahippocampal cortex from  
892 high-resolution MR images: considering the variability of the collateral sulcus. *Cerebral*  
893 *Cortex*, 12(12), 1342-1353.
- 894
- 895 Packard, M.G., and McGaugh, J.L. (1996). Inactivation of hippocampus or caudate nucleus  
896 with lidocaine differentially affects expression of place and response learning. *Neurobiology*  
897 *of learning and memory* 65, 65-72.
- 898
- 899 Poppenk, J., Evensmoen, H. R., Moscovitch, M., & Nadel, L. (2013). Long-axis  
900 specialization of the human hippocampus. *Trends in cognitive sciences*, 17(5), 230-240.
- 901
- 902 Price, A. R., Peelle, J. E., Bonner, M. F., Grossman, M., & Hamilton, R. H. (2016). Causal  
903 evidence for a mechanism of semantic integration in the angular gyrus as revealed by high-  
904 definition transcranial direct current stimulation. *Journal of Neuroscience*, 36(13), 3829-  
905 3838.
- 906
- 907 Ranganath, C., & Ritchey, M. (2012). Two cortical systems for memory-guided  
908 behaviour. *Nature Reviews Neuroscience*, 13(10), 713.
- 909



- 910 Ranganath, C., Heller, A., Cohen, M. X., Brozinsky, C. J., & Rissman, J. (2005). Functional  
911 connectivity with the hippocampus during successful memory formation. *Hippocampus*,  
912 15(8), 997-1005.  
913
- 914 Rolls, E. T., Joliot, M., & Tzourio-Mazoyer, N. (2015). Implementation of a new parcellation  
915 of the orbitofrontal cortex in the automated anatomical labeling atlas. *Neuroimage*, 122, 1-5.  
916
- 917 Redish, A.D., and Touretzky, D.S. (1998). The role of the hippocampus in solving the Morris  
918 water maze. *Neural computation* 10, 73-111.  
919
- 920 Seghier, M. L. (2013). The angular gyrus: multiple functions and multiple subdivisions. *The*  
921 *Neuroscientist*, 19(1), 43-61.  
922
- 923 Suarez-Jimenez, B., Bisby, J. A., Horner, A. J., King, J. A., Pine, D. S., & Burgess, N.  
924 (2018). Linked networks for learning and expressing location-specific threat. *Proceedings of*  
925 *the National Academy of Sciences*, 115(5), E1032-E1040.  
926
- 927 Spiers, H. J., & Maguire, E. A. (2007). A navigational guidance system in the human  
928 brain. *Hippocampus*, 17(8), 618-626.  
929
- 930 Schinazi, V. R., Nardi, D., Newcombe, N. S., Shipley, T. F., & Epstein, R. A. (2013).  
931 Hippocampal size predicts rapid learning of a cognitive map in humans. *Hippocampus*, 23(6),  
932 515-528.  
933
- 934 Squire, L.R., and Zola-Morgan, J.T. (2011). The cognitive neuroscience of human memory since  
935 H.M. *Annual review of neuroscience* 34, 259-288.  
936
- 937 Schacter, D.L., Addis, D.R., and Buckner, R.L. (2007). Remembering the past to imagine the  
938 future: the prospective brain. *Nature reviews Neuroscience* 8, 657-661.  
939
- 940 Spreng, R. N., & Schacter, D. L. (2011). Default network modulation and large-scale network  
941 interactivity in healthy young and old adults. *Cerebral Cortex*, 22(11), 2610-2621.  
942
- 943 Schacter, D.L. (2012). Adaptive constructive processes and the future of memory. *The*  
944 *American psychologist* 67, 603-613.  
945
- 946 Stolk, A., D'Imperio, D., di Pellegrino, G., and Toni, I. (2015). Altered communicative  
947 decisions following ventromedial prefrontal lesions. *Current biology : CB* 25, 1469-1474.  
948
- 949 Saxena, S., Brody, A. L., Schwartz, J. M., & Baxter, L. R. (1998). Neuroimaging and frontal-  
950 subcortical circuitry in obsessive-compulsive disorder. *The British Journal of*  
951 *Psychiatry*, 173(S35), 26-37.  
952
- 953 Suzuki, W., and Naya, Y. (2011). Two routes for remembering the past. *Cell* 147, 493-495.  
954
- 955 Suzuki, W.A., and Naya, Y. (2014). The perirhinal cortex. *Annual review of neuroscience* 37,  
956 39-53.  
957
- 958 Tolman, E. C. (1948). Cognitive maps in rats and men. *Psychological review*, 55(4), 189.  
959



- 960 Tavares, R. M., Mendelsohn, A., Grossman, Y., Williams, C. H., Shapiro, M., Trope, Y., &  
961 Schiller, D. (2015). A map for social navigation in the human brain. *Neuron*, 87(1), 231-243.  
962
- 963 Tulving, E. (2002). Episodic memory: from mind to brain. *Annual review of*  
964 *psychology*, 53(1), 1-25.  
965
- 966 Tompary, A., & Davachi, L. (2017). Consolidation promotes the emergence of  
967 representational overlap in the hippocampus and medial prefrontal cortex. *Neuron*, 96(1),  
968 228-241.  
969
- 970 Vass LK, Epstein RA (2013) Abstract representations of location and facing direction in the  
971 human brain. *J Neurosci* 33:6133–6142. CrossRef Medline  
972
- 973 Woollett, K., & Maguire, E. A. (2011). Acquiring “the Knowledge” of London's layout  
974 drives structural brain changes. *Current biology*, 21(24), 2109-2114.  
975
- 976 Winkler, A. M., Ridgway, G. R., Webster, M. A., Smith, S. M., & Nichols, T. E. (2014).  
977 Permutation inference for the general linear model. *Neuroimage*, 92, 381-397.  
978
- 979 Wang, C., Chen, X., Lee, H., Deshmukh, S.S., Yoganarasimha, D., Savelli, F., and Knierim,  
980 J.J. (2018). Egocentric coding of external items in the lateral entorhinal cortex. *Science* 362,  
981 945-949.  
982
- 983 Woolrich, M. W., Ripley, B. D., Brady, M., & Smith, S. M. (2001). Temporal  
984 Autocorrelation in Univariate Linear Modeling of fMRI Data. *NeuroImage*, 14(6), 1370–  
985 1386.  
986
- 987 Woolrich, M. W., Behrens, T. E. J., & Smith, S. M. (2004). Constrained linear basis sets for  
988 HRF modelling using Variational Bayes. *NeuroImage*, 21(4), 1748–1761.  
989
- 990 Wikenheiser, A. M., & Schoenbaum, G. (2016). Over the river, through the woods: cognitive  
991 maps in the hippocampus and orbitofrontal cortex. *Nature Reviews Neuroscience*, 17(8), 513.  
992
- 993 Young, J. J., & Shapiro, M. L. (2011). Dynamic coding of goal-directed paths by orbital  
994 prefrontal cortex. *Journal of Neuroscience*, 31(16), 5989-6000.  
995
- 996 Yamada, H., Louie, K., Tymula, A., and Glimcher, P.W. (2018). Free choice shapes  
997 normalized value signals in medial orbitofrontal cortex. *Nature communications* 9, 162.  
998
- 999 Zeithamova, D., de Araujo Sanchez, M. A., & Adke, A. (2017). Trial timing and pattern-  
1000 information analyses of fMRI data. *Neuroimage*, 153, 221-231.  
1001
